# Supplementary material for: Zinc oxide–copper model nanocatalysts for CO2 hydrogenation: morphology and interface effects
Source: Royal Society of Chemistry journal article supplement (doi:10.1039/d3ma00872j), 2023-12-20
Supplement: d3ma00872j1.pdf [file d3ma00872j1.pdf]

## Zinc oxide—copper model nanocatalysts for carbon dioxide hydrogenation: morphology and interface effects

Sonia Hadaoui,<sup>a,b</sup> Hang Liu,<sup>a</sup> Zhang Lei,<sup>a</sup> Sébastien Lebègue,<sup>c</sup> Rabah Benbalagh,<sup>a</sup> Alexa Courty,<sup>b\*</sup> and Ahmed Naitabdi,<sup>a\*</sup>

<sup>a</sup> Laboratoire de Chimie Physique – Matière et Rayonnement, UMR 7614, Sorbonne Université, 4 place Jussieu, 75005 Paris, France

<sup>b</sup> Laboratoire, MONARIS, UMR 8233, Sorbonne Université, 4 place Jussieu, 75005 Paris, France.

<sup>c</sup> Laboratoire de Physique et Chimie Théoriques, UMR 7019, Université de Lorraine, 54000 Nancy

\*[ahmed.nait\\_abdi@sorbonne-universite.fr](mailto:ahmed.nait_abdi@sorbonne-universite.fr)

\*[alexa.courty@sorbonne-universite.fr](mailto:alexa.courty@sorbonne-universite.fr)

### 1. Zn LMM Auger spectra on ZnO/Cu(111) as a function of the Zn thickness

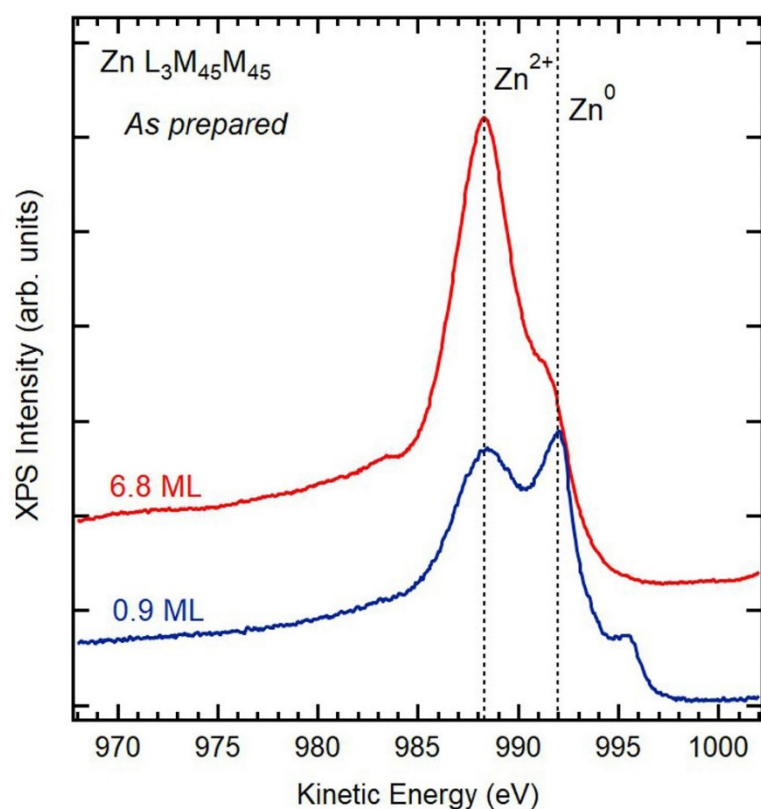

**Figure S1.** High resolution LMM Auger spectra of Zn acquired on ZnO/Cu(111) as a function of Zn thicknesses (0.9 ML and 6.8 ML) at room temperature as prepared (UHV) before exposure to the reactive gases.

2. Deconvolution of Zn 3p and Cu 3p core-level spectra acquired on ZnO/Cu(111) samples as a function of reactive gases ( $\text{CO}_2$ ,  $\text{H}_2$ , and  $\text{CO}_2+\text{H}_2$ ) exposures, Zn thickness and temperature

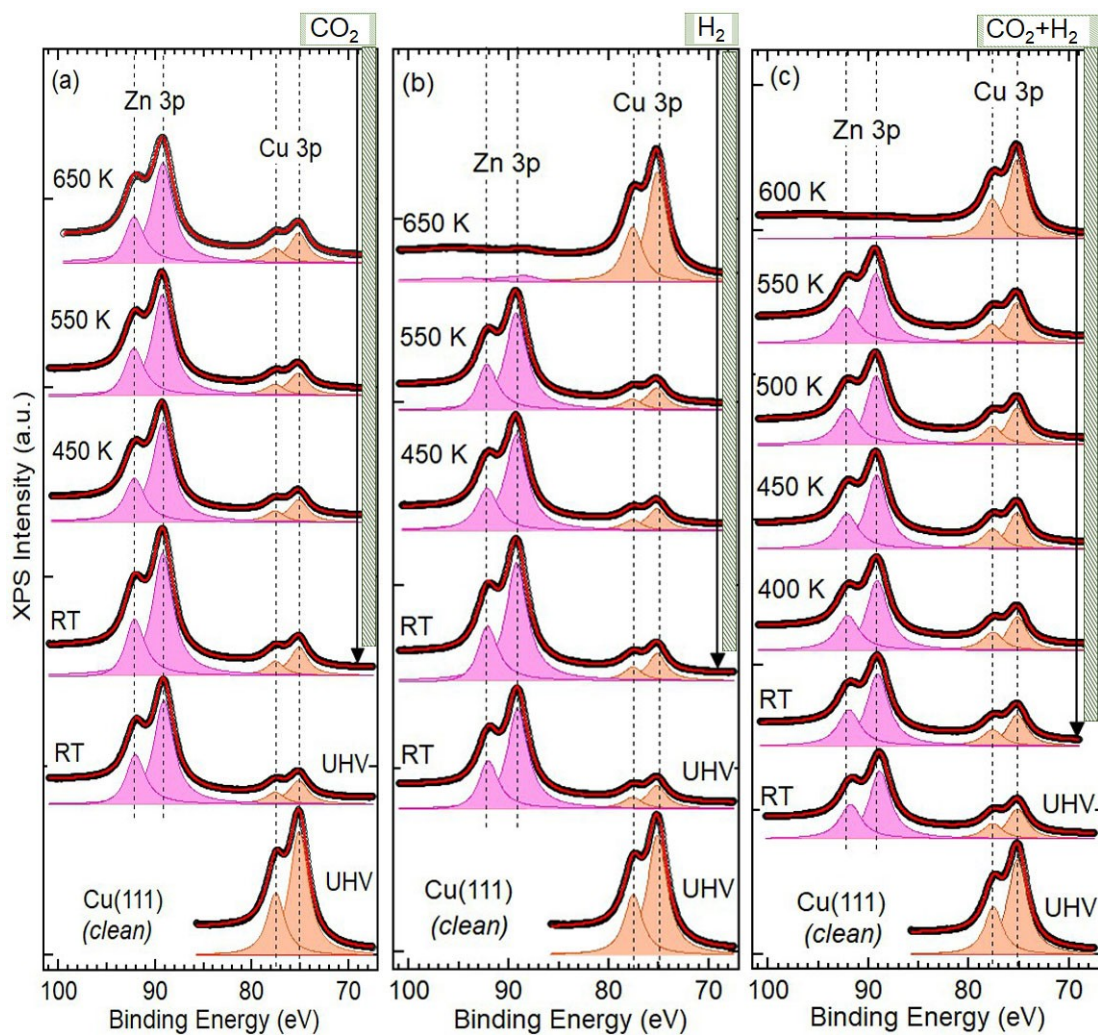

**Figure S2.** XPS Cu 3p and Zn 3p core level spectra of similar three ZnO ultrathin film samples with a thickness of 6.8 ML grown on the Cu(111) surface as a function of the temperature and gas exposures. (a) exposure to pure  $\text{CO}_2$  at 5 mbar nominal pressure. (b) exposure to pure  $\text{H}_2$  at 5 mbar nominal pressure. (c) exposure to the gas mixture ( $\text{CO}_2:\text{H}_2$ ) at 5 mbar nominal pressure at a (1:3) ratio. The spectra labeled UHV were acquired on the samples as prepared before exposure to reactive gases. The spectra labeled Cu(111) (clean) were acquired on the clean Cu(111) surface prior to ZnO growth.

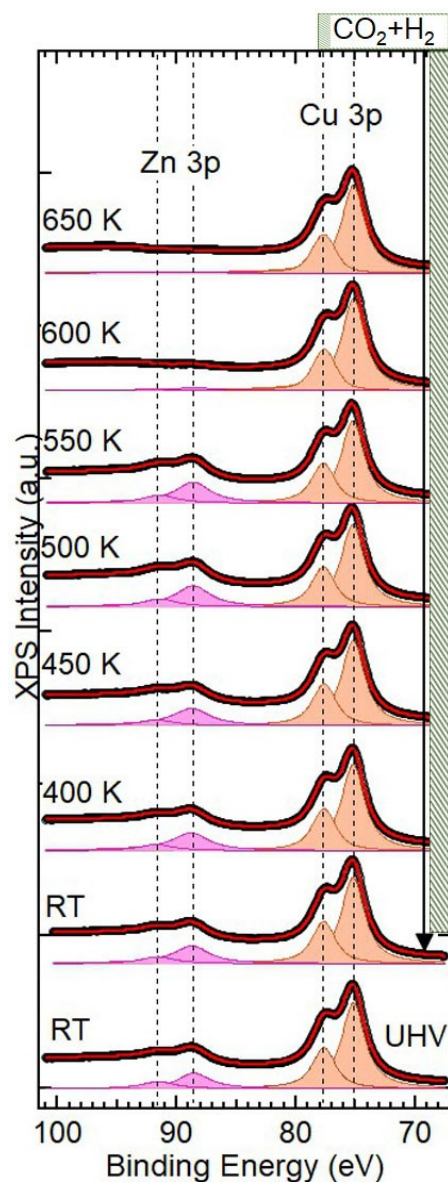

**Figure S3.** XPS Cu 3p and Zn 3p core level spectra of the ZnO ultrathin film sample with a thickness of 0.9 ML grown on the Cu(111) surface as a function of the temperature and gas exposures (CO<sub>2</sub>:H<sub>2</sub>) at 5 mbar nominal pressure at a (1:3) ratio. The spectrum labeled UHV was acquired on the sample as prepared before exposure to reactive gases.

### 3. STM images of the pristine Cu(111) and Cu<sub>2</sub>O/Cu(111) surfaces

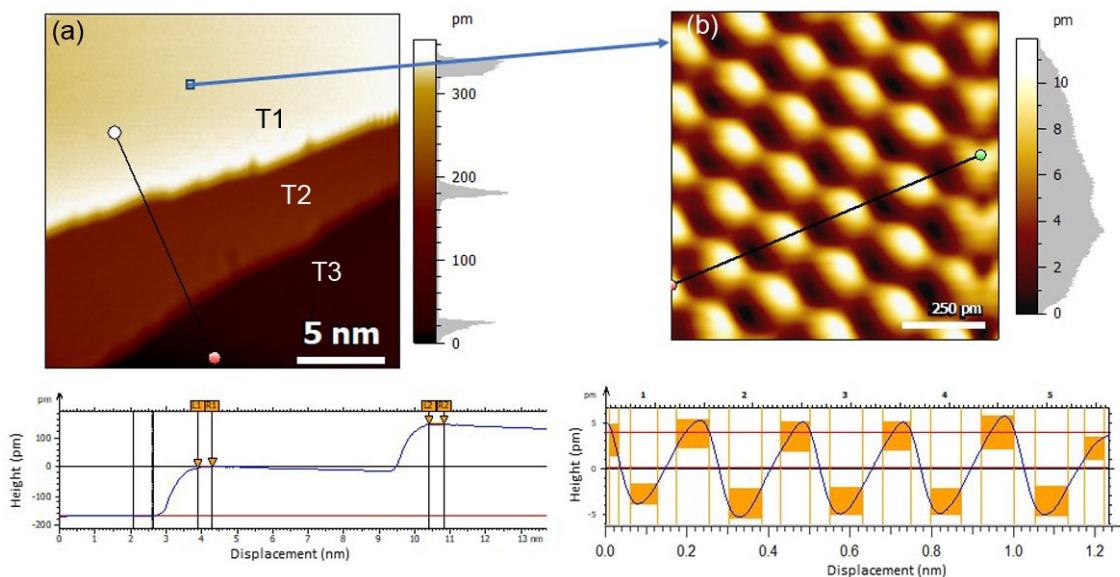

**Figure S4.** STM images of the clean Cu(111) surface after several cycles of argon ion sputtering (15  $\mu$ A) and annealing at 723 K in UHV. (a) is a large-scale image featuring three terraces (T1, T2 and T3). The step height between two terraces is mono-atomic. (b) high resolution image featuring Cu atomic resolution.

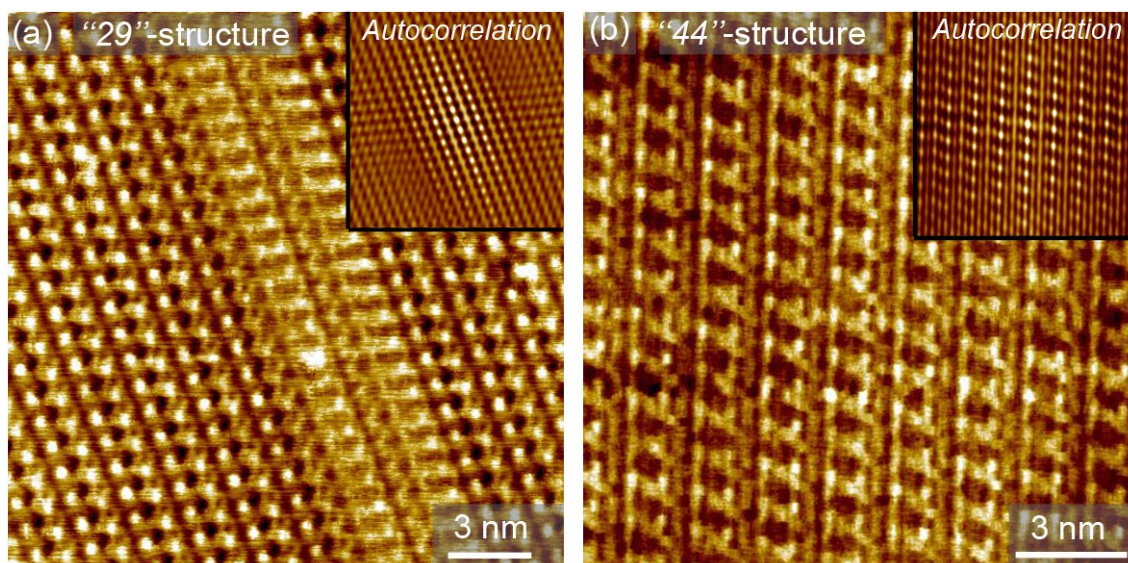

**Figure S5.** high resolution STM images obtained on the  $\text{Cu}_2\text{O}$  metal-oxide grown on a clean Cu(111) surface after exposure to  $\text{O}_2$  and annealing. (a) displays atomic resolution of the “29-structure” corresponding to the  $(\sqrt{7}3R5.8^\circ \times \sqrt{2}1R10.9^\circ)$  adlayer. (a) displays atomic resolution of the “44-structure” corresponding to the  $(\sqrt{13}R46.1^\circ \times 7R21.8^\circ)$  adlayer. The Inserts are autocorrelation images reflecting the periodic signal corresponding to the atomic arrangement of the two  $\text{Cu}_2\text{O}$  structures.
